# Supplementary material
Source: PubMed Central journal article supplement (PMC7785592)

Figure S1: Radiation Pneumonitis rate by Lung V5 in patients older vs. younger than 65 years old

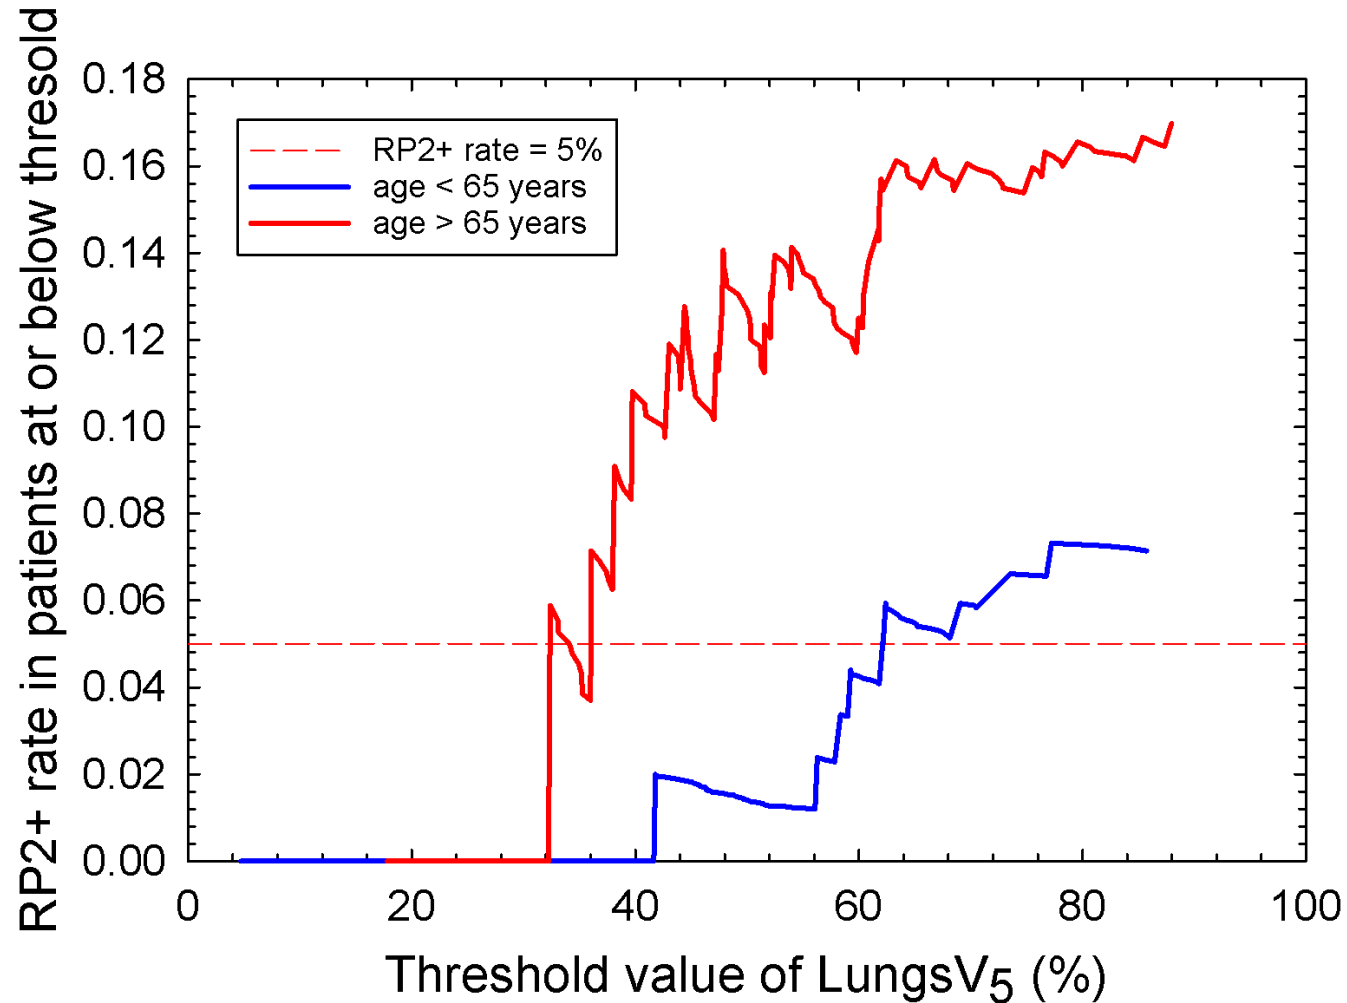

Supplement: NIHMS1638460-supplement-2.pdf [file NIHMS1638460-supplement-2.pdf]
